# Supplementary material for: Burden of Nonsynonymous Mutations among TCGA Cancers and Candidate Immune Checkpoint Inhibitor Responses
Source: Oxford University Press journal article supplement (doi:10.1158/0008-5472.can-16-0170), 2016-05-19
Supplement: 00085472can160170-sup-161141_1_supp_3413758_t4ttlt.xls [file 00085472can160170-sup-161141_1_supp_3413758_t4ttlt.xls]

## Sheet: Sheet1
Supplementary Table 2: Comparison between TCGA and TumorPortal (replication) set
		TCGA			TumorPortal
		Sample	≥ 192 NsM		Sample	≥ 192 NsM		Fisher's test
	Tumor	size	yes (%)	no (%)	size	yes (%)	no (%)	p-value
	BRCA	988	3.23887	96.7611	117	0.854701	99.1453	0.64
	HNSC	510	17.3	82.7451	78	14.1026	85.8974	0.66
	LUAD	563	47.6021	52.0426	169	45.5621	54.4379	0.63
	SKCM	290	68.3	31.3793	118	66.1017	33.8983	0.25
	PRAD	425	0.705882	99.2941	131	0	100	1
	Stats: Fisher's test comparing TCGA and TumorPortal for each tumor type
	Replication samples were downloaded from http://www.tumorportal.org/ on 03/09/2016
	BRCA: Breast cancer; Replication samples from Banerji, S. et al. Sequence analysis of mutations and translocations across breast cancer subtypes. Nature 486, 405-9 (2012).
	HNSC: head and neck cancer; Replication samples from Stransky, N. et al. The mutational landscape of head and neck squamous cell carcinoma. Science 333, 1157-60 (2011).
	LUAD: lung adenocarcinoma; Replication samples from Imielinski, M. et al. Mapping the hallmarks of lung adenocarcinoma with massively parallel sequencing. Cell 150, 1107-20 (2012).
	SKCM: melanoma; Replication samples from Berger, M.F. et al. Melanoma genome sequencing reveals frequent PREX2 mutations. Nature 485, 502-6 (2012) and Hodis, E. et al. A landscape of driver mutations in melanoma. Cell 150, 251-63 (2012).
	PRAD: prostate cancer; Replication samples from Berger, M.F. et al. The genomic complexity of primary human prostate cancer. Nature 470, 214-20 (2011) and Barbieri, C.E. et al. Exome sequencing identifies recurrent SPOP, FOXA1 and MED12 mutations in prostate cancer. Nat Genet 44, 685-9 (2012).
